# Supplementary material for: Life-Space Activities Are Associated with the Prognosis of Older Adults with Cardiovascular Disease
Source: MDPI journal article supplement (doi:10.3390/jcdd9100323), 2022-09-24
Supplement: s1 [file s1]

**These questions refer to your activities just within the past month**

| Life-space level                                                                                                                                             |                 | Frequency                                                                 | Independence                                                                          |
|--------------------------------------------------------------------------------------------------------------------------------------------------------------|-----------------|---------------------------------------------------------------------------|---------------------------------------------------------------------------------------|
| During the past four weeks, have you been to...                                                                                                              |                 | How often did you get there ?                                             | Did you use aids or equipment ?<br>Did you need help from another person ?            |
| <b>Level 1</b><br>Other rooms of your home besides the room where you sleep ?                                                                                | 1. Yes<br>2. No | 1. Less then 1/week<br>2. 1-3 times/week<br>3. 4-6 times/week<br>4. Daily | 1. Personal assistance<br>2. Equipment only<br>3. No equipment or personal assistance |
| <b>Level 2</b><br>An area outside your home, such as your porch, deck or patio, hallway (of an apartment building) or garage, In your own yard or driveway ? | 1. Yes<br>2. No | 1. Less then 1/week<br>2. 1-3 times/week<br>3. 4-6 times/week<br>4. Daily | 1. Personal assistance<br>2. Equipment only<br>3. No equipment or personal assistance |
| <b>Level 3</b><br>Places in your neighborhood, other than your own yard or apartment building ?                                                              | 1. Yes<br>2. No | 1. Less then 1/week<br>2. 1-3 times/week<br>3. 4-6 times/week<br>4. Daily | 1. Personal assistance<br>2. Equipment only<br>3. No equipment or personal assistance |
| <b>Level 4</b><br>Places outside your neighborhood but within your town ?                                                                                    | 1. Yes<br>2. No | 1. Less then 1/week<br>2. 1-3 times/week<br>3. 4-6 times/week<br>4. Daily | 1. Personal assistance<br>2. Equipment only<br>3. No equipment or personal assistance |
| <b>Level 5</b><br>Places outside your town ?                                                                                                                 | 1. Yes<br>2. No | 1. Less then 1/week<br>2. 1-3 times/week<br>3. 4-6 times/week<br>4. Daily | 1. Personal assistance<br>2. Equipment only<br>3. No equipment or personal assistance |
